# Supplementary material for: Ustiloxin G, a New Cyclopeptide Mycotoxin from Rice False Smut Balls
Source: PubMed Central journal article supplement (PMC5331433; doi:10.3390/toxins9020054), 2017-02-10
Supplement: toxins-09-00054-s001.pdf [file toxins-09-00054-s001.pdf]

# Supplementary Materials: Ustiloxin G, a New Cyclopeptide Mycotoxin from Rice False Smut Balls

Xiaohan Wang, Jian Wang, Daowan Lai, Weixuan Wang, Jungui Dai, Ligang Zhou and Yang Liu

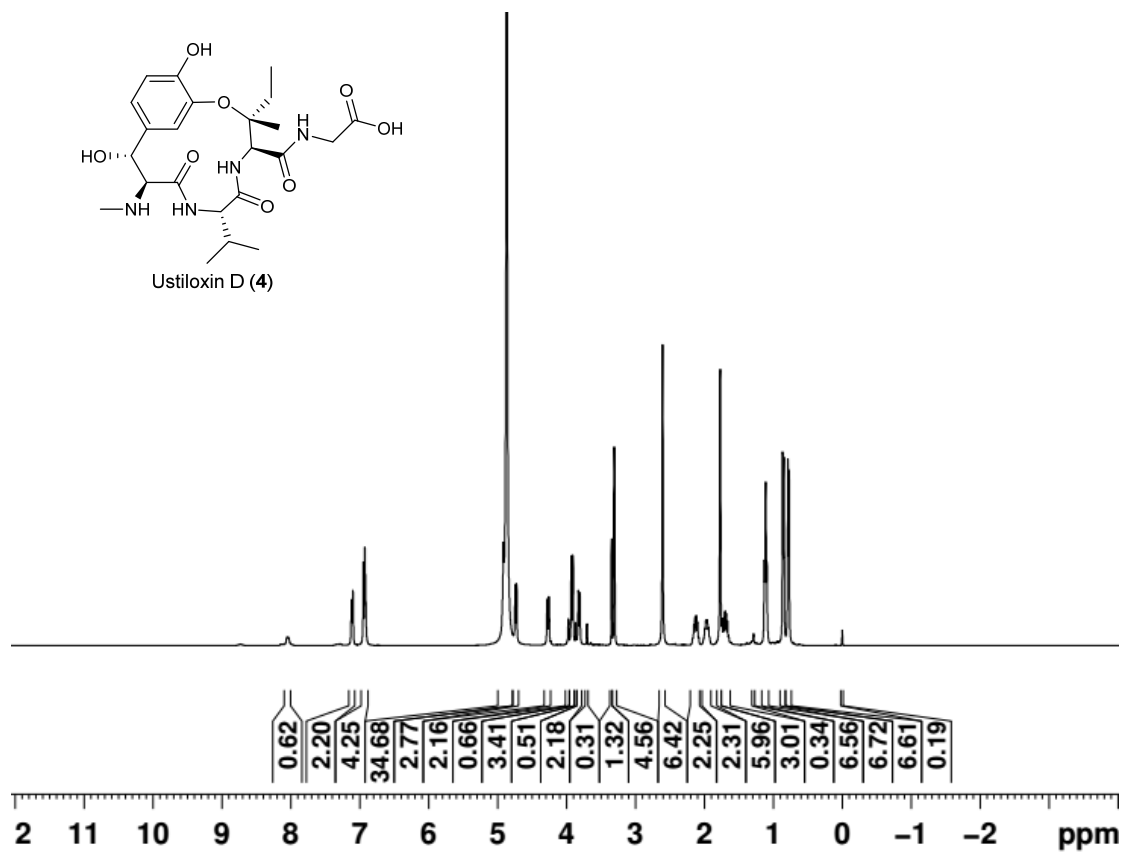

Figure S1. <sup>1</sup>H-NMR spectrum of ustiloxin D (4) (CD<sub>3</sub>OD, 400 MHz).

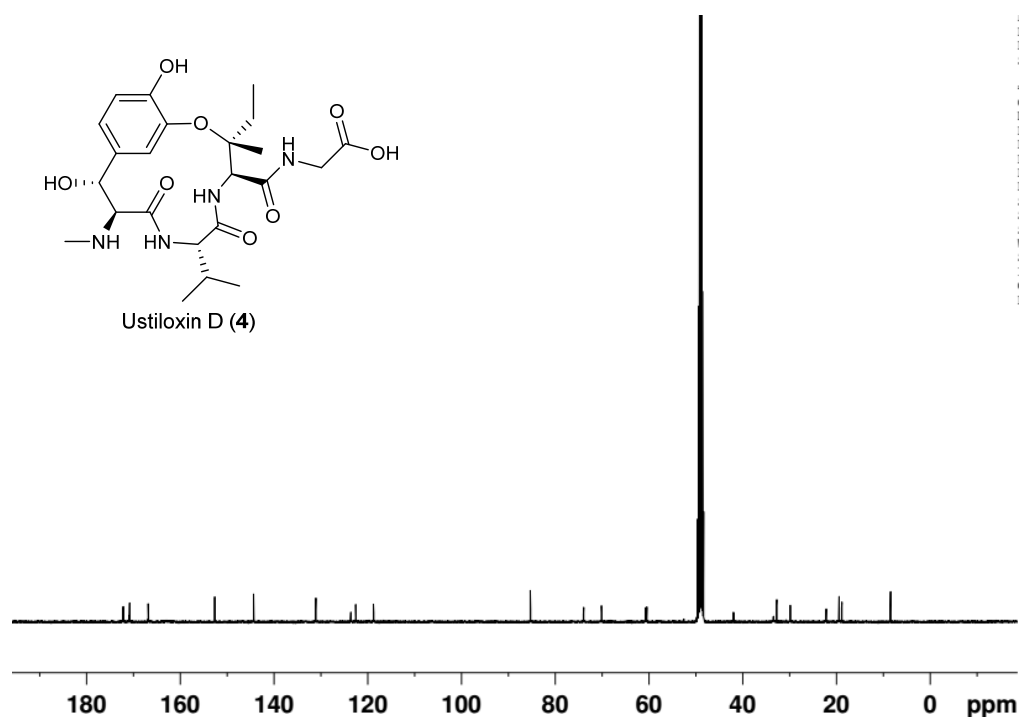

Figure S2. <sup>13</sup>C-NMR spectrum of ustiloxin D (4) (CD<sub>3</sub>OD, 100 MHz).

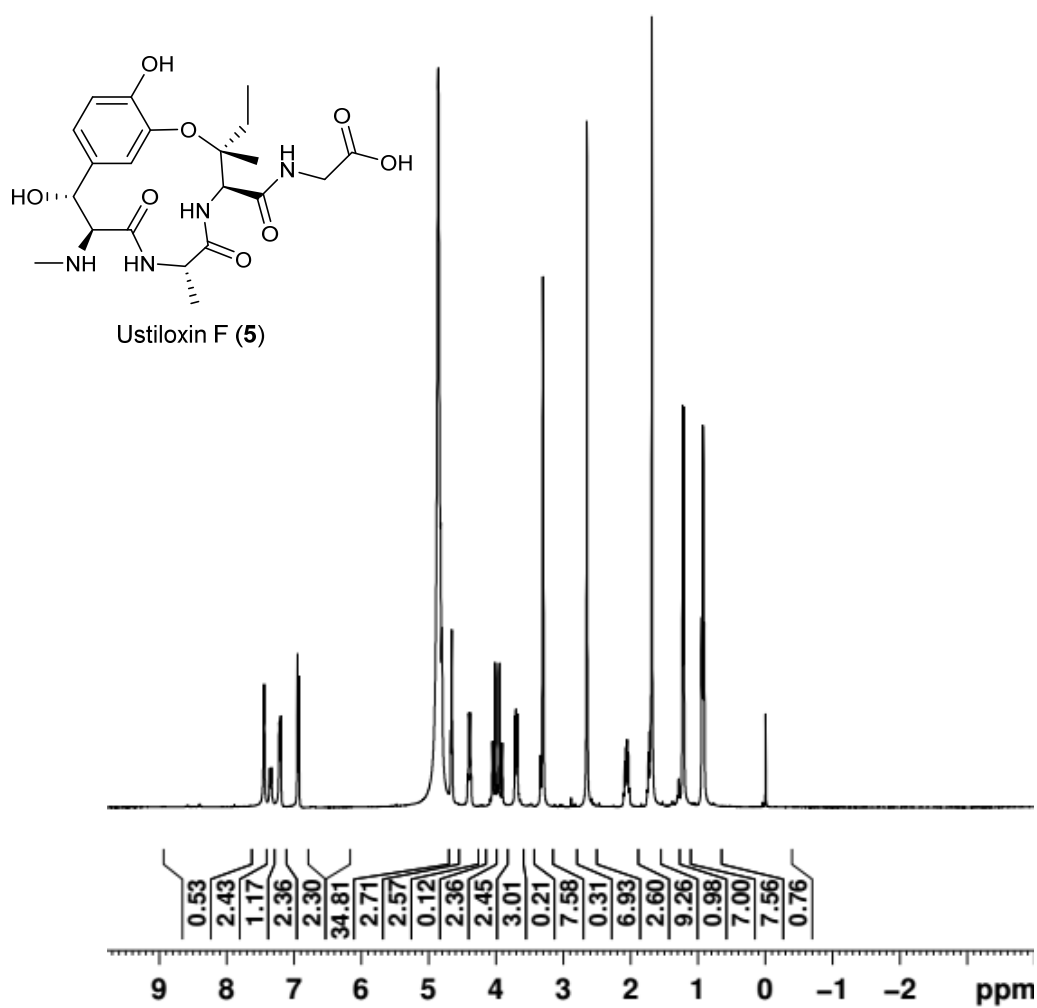

Figure S3.  $^1\text{H-NMR}$  spectrum of ustiloxin F (5) ( $\text{CD}_3\text{OD}$ , 400 MHz).

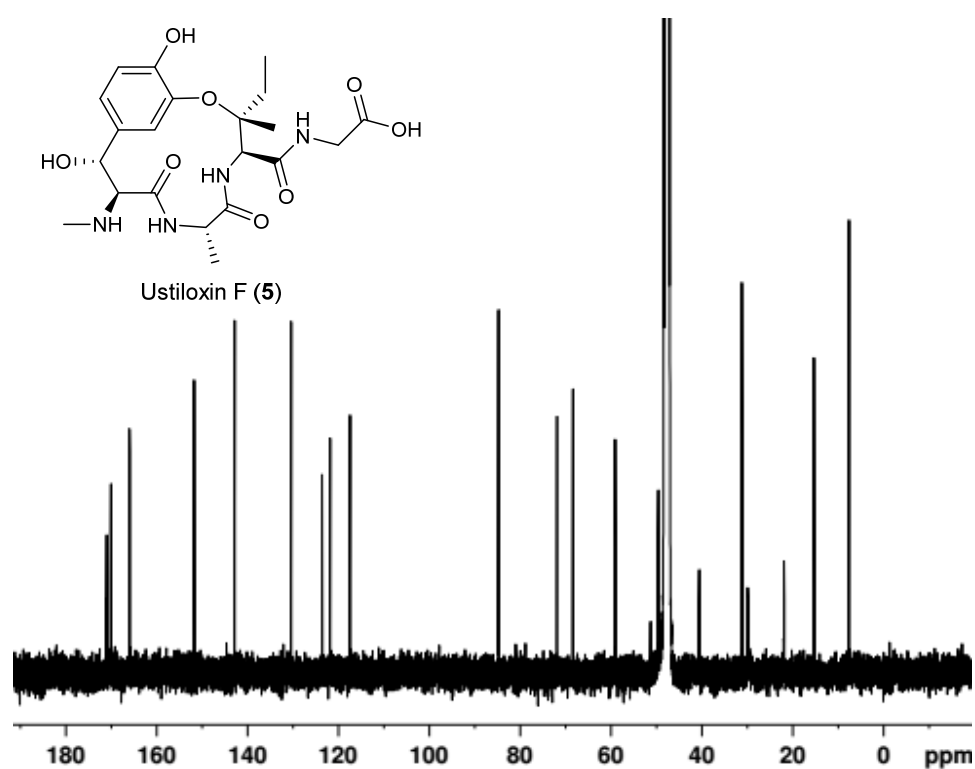

Figure S4.  $^{13}\text{C-NMR}$  spectrum of ustiloxin F (5) ( $\text{CD}_3\text{OD}$ , 100 MHz).

Peking University Mass Spectrometry Sample Analysis Report

Analysis Info

Analysis Name 15040904\_20150423\_000003.d  
 Sample Uyb-3  
 Comment ESI Positive

Acquisition Date 4/23/2015 1:41:59 PM  
 Instrument Bruker Apex IV FTMS  
 Operator Peking University

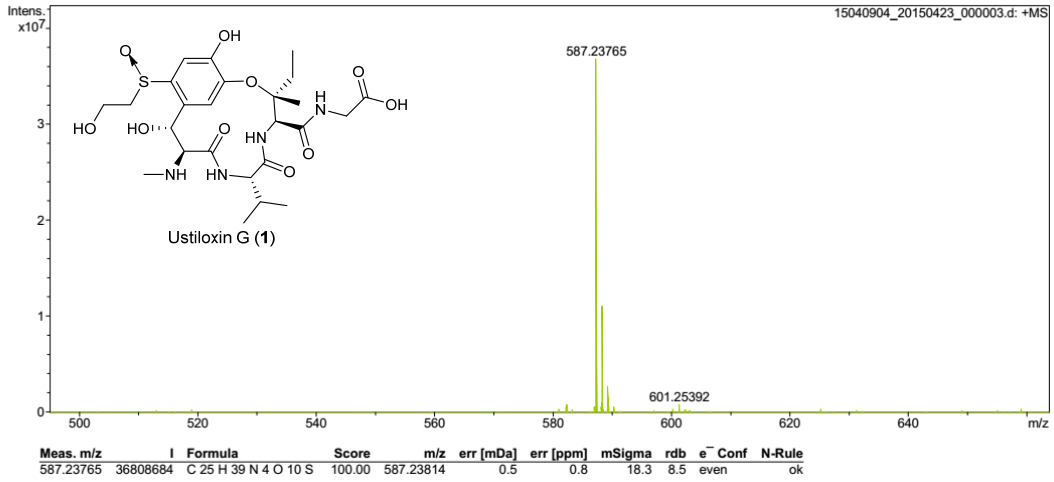

Figure S5. HR-ESI-MS spectrum of ustiloxin G (1).

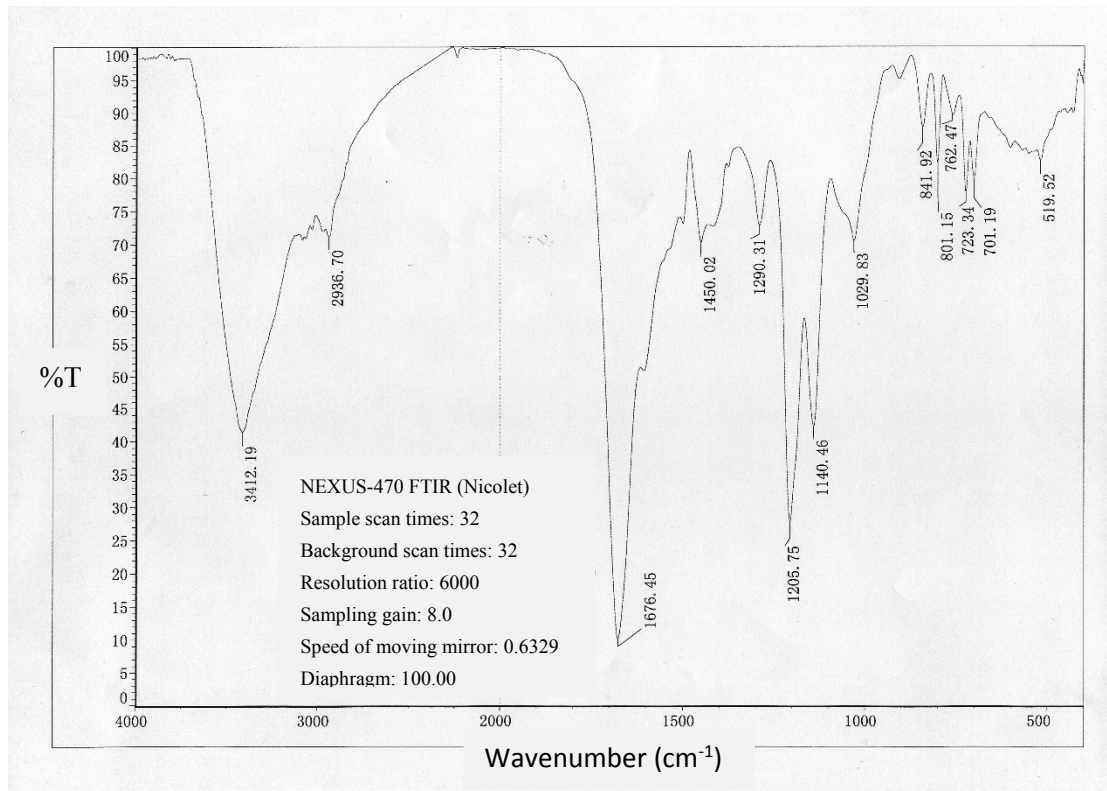

Figure S6. IR spectrum of ustiloxin G (1).

Uvb-3\_13C

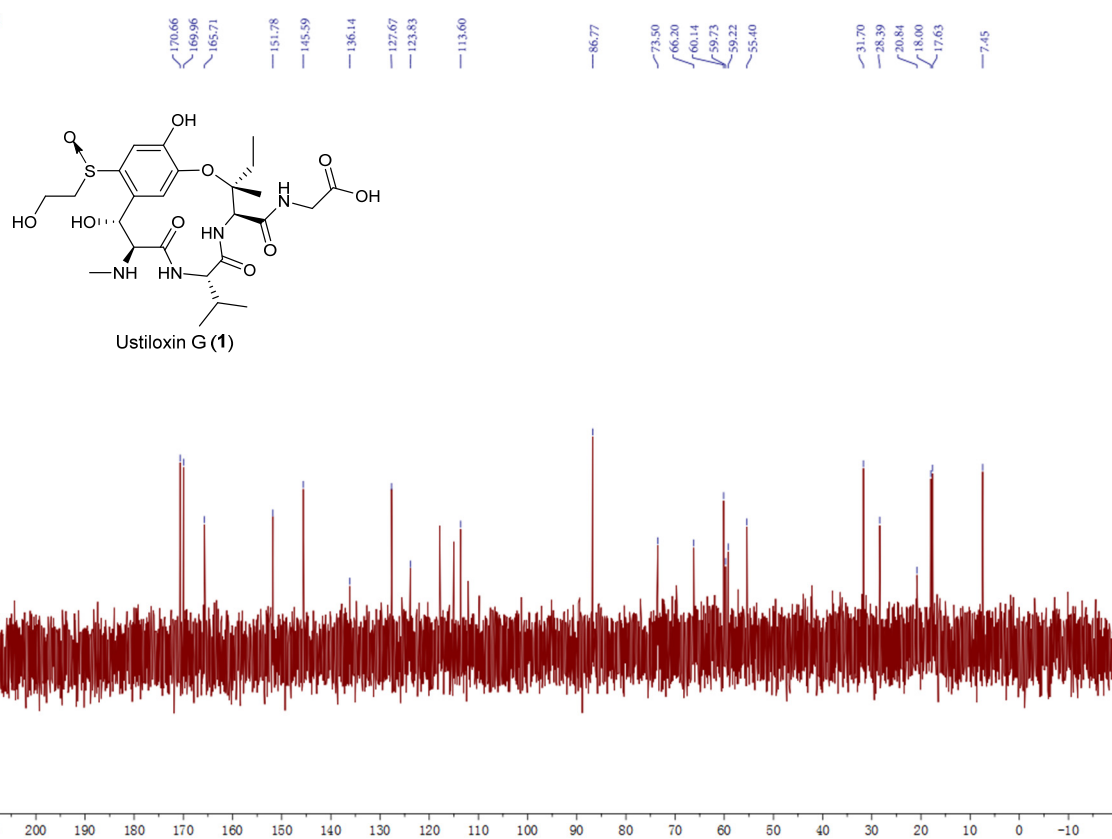

Figure S7. <sup>13</sup>C-NMR spectrum of ustiloxin G (1) (D<sub>2</sub>O, 100 MHz).

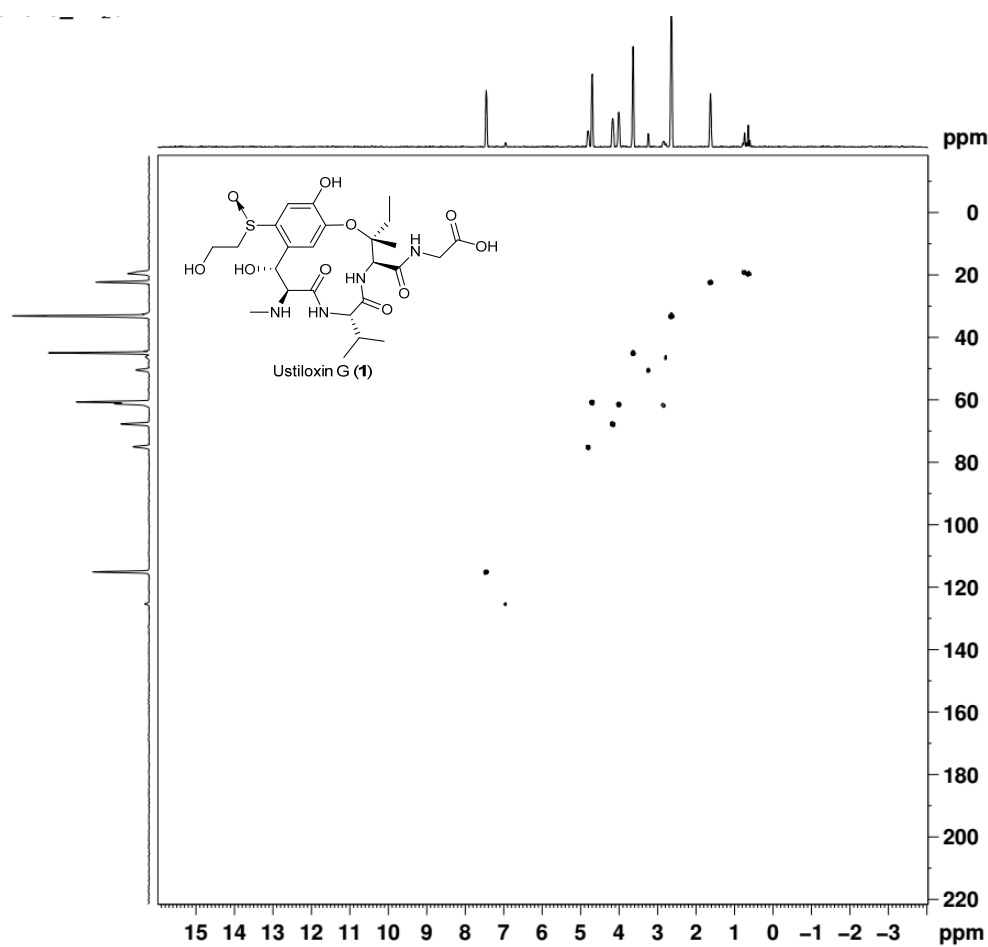

Figure S8. HMQC spectrum of ustiloxin G (1) (D<sub>2</sub>O).

Uvb-3

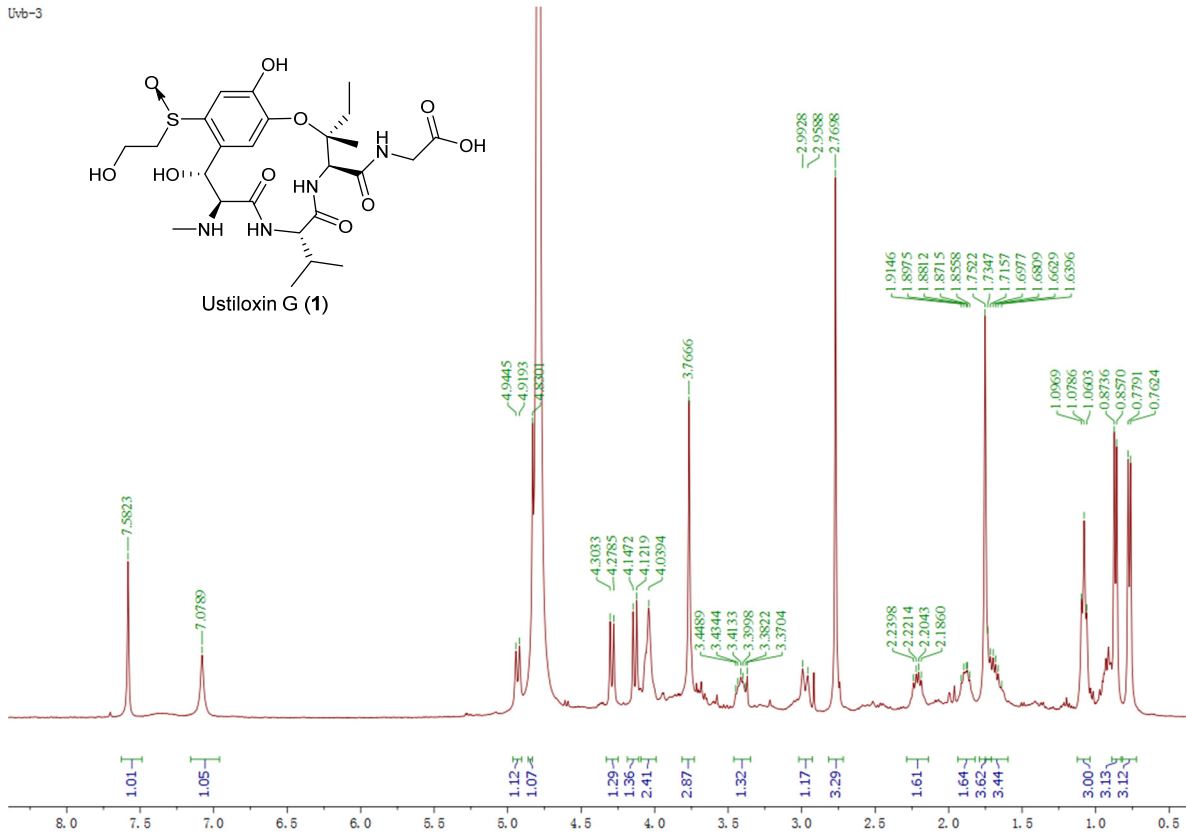

Figure S9. <sup>1</sup>H-NMR spectrum of ustiloxin G (1) (D<sub>2</sub>O, 400 MHz).

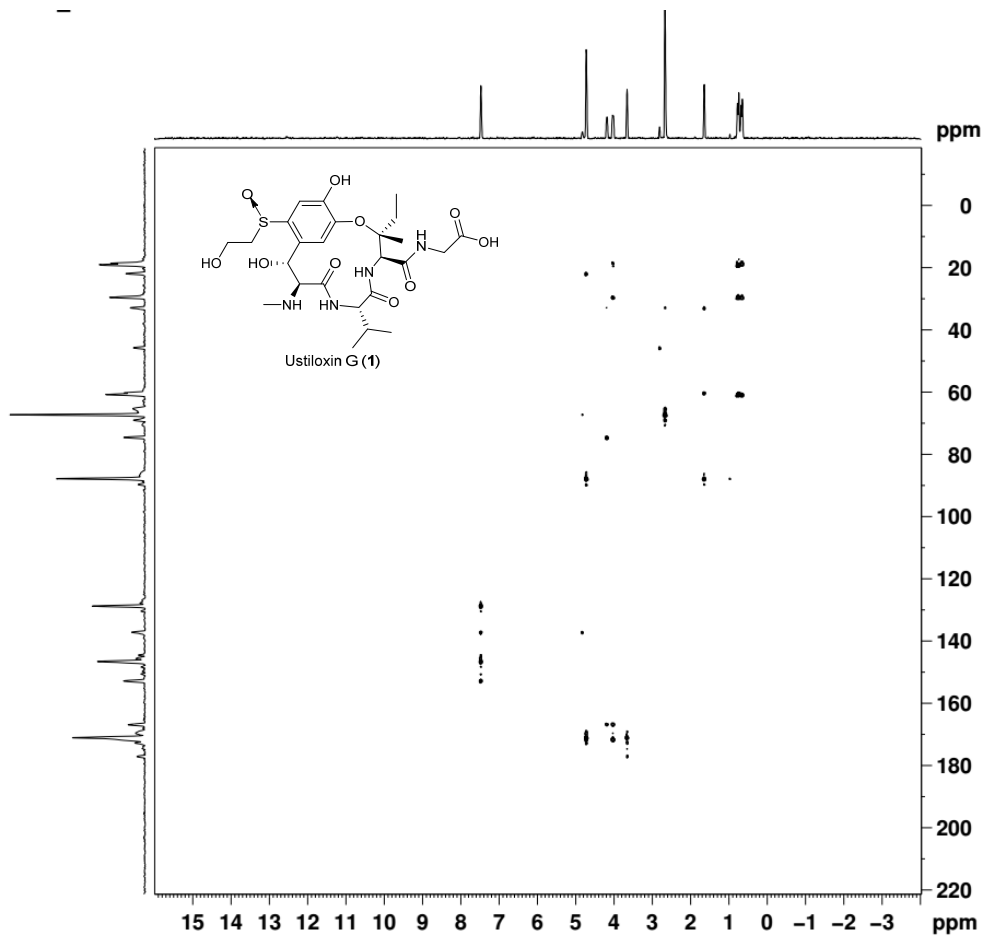

Figure S10. HMBC spectrum of ustiloxin G (1) (D<sub>2</sub>O).

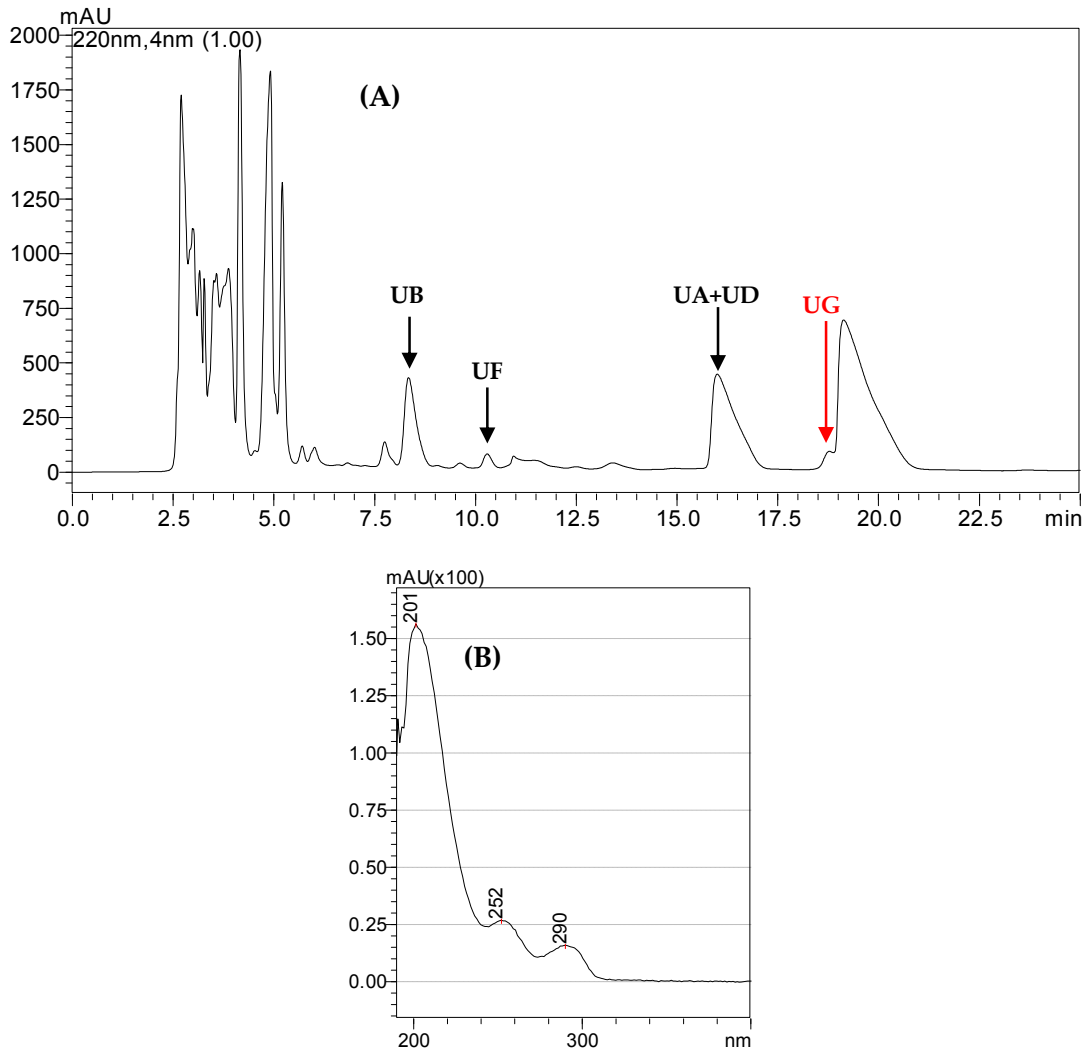

**Figure S11.** HPLC chromatogram of the water extract of rice FSBs. Ustiloxins A, B, D, F and G were abbreviated as UA, UB, UD, UF and UG, respectively. (A) HPLC profile of the water extract of rice FSSs; (B) The UV absorption spectrum of UG.
